# Supplementary material for: Ultrasound imaging of bone fractures
Source: Springer Nature journal article supplement (doi:10.1186/s13244-022-01335-z), 2022-12-13
Supplement: MOESM1 [file 13244_2022_1335_MOESM1_ESM.pdf]

## ELECTRONIC SUPPLEMENTARY MATERIAL

### Ultrasound Imaging of Bone Fractures

#### Supplementary Figure 1

##### Hematoma and Periosteum.

A bone fracture can present histological preservation of the periosteum (*yellow*) with a dome shape hematoma (*red*) (**A**); or, can show a post-traumatic disruption of the periosteal layer (*yellow*) with a diffusion of the blood (*red*) within the surrounding soft tissues (**B**). The subperiosteal hematoma (*red*) is often related to a mechanical disruption of the Sharpey's fibers (*black lines*) with dissociation of the anatomical interface between the cortical bone and periosteum (*yellow*) (**C**).

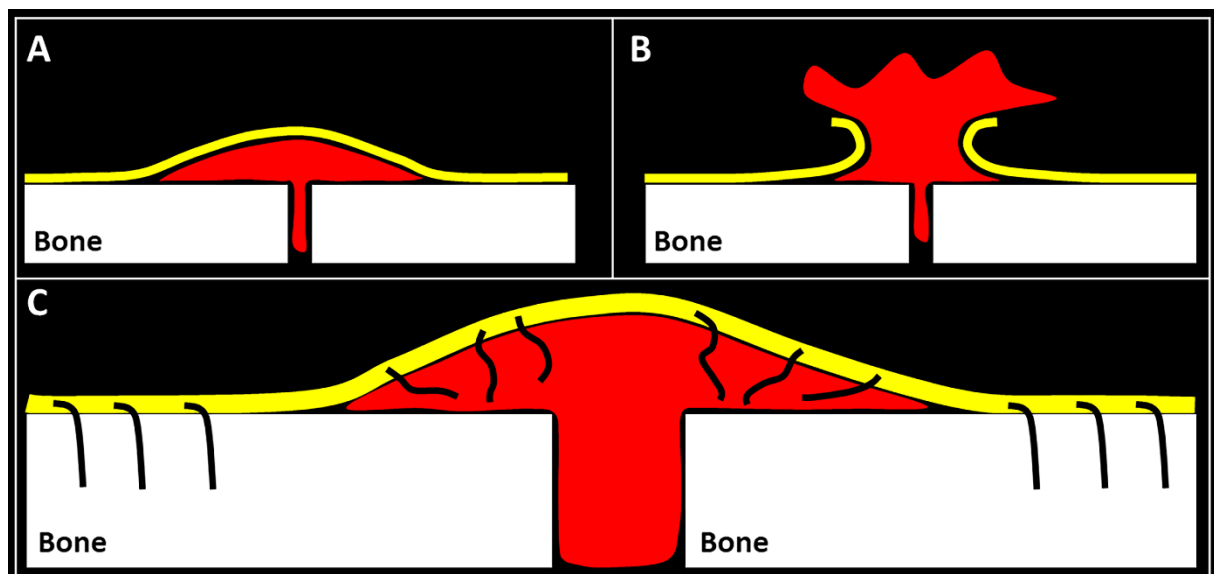

## **Video legends**

### **Video 1**

High-sensitive power Doppler clearly shows feeding vessels penetrating the bone cortex and, traveling within nutritional foramina.

### **Video 2**

Cartilaginous plate in between the metaphysis and epiphysis of the distal femur in young volunteer.

### **Video 3**

Long-axis view of a post-traumatic rib fracture with bulging of the periosteum and subperiosteal hematoma.

### **Video 4**

Sonographic tracking of a post-traumatic rib fracture. Of note, the transverse acoustic window easily shows the focal interruption of the cortical bone.

### **Video 5**

Hill-Sachs defect presents as a depression of the cortical bone in the posterolateral side of the humeral head.

### **Video 6**

A longitudinal scan shows the avulsion fracture of the base of the 5<sup>th</sup> metatarsal bone at the attachment site of the lateral cord of plantar fascia after an ankle sprain.

#### **Video 7**

A transverse scan shows the hematoma surrounding the bony fragment detached from the base of the 5<sup>th</sup> metatarsal bone after an ankle sprain.

#### **Video 8**

Local hematoma can be nicely observed surrounding the cortical irregularity due to a post-traumatic fracture of the distal radius.

#### **Video 9**

High-sensitive power Doppler allows to observe the microvasculature within the hematoma surrounding the bone fracture.

#### **Video 10**

High-sensitive power Doppler shows the vascular invasion - originating from the thickened periosteum - of the fibrous callus during the healing phase.

#### **Video 11**

The color Doppler clearly shows neovessels located within the superficial portion of the (hypoechoic) fibrous callus in a patient with a post-traumatic fracture of the humeral neck.

## **Video 12**

High-sensitive power Doppler shows the microvasculature within the thickened periosteum and around the partially calcified callus.
